# Supplementary material for: A facile freeze–thaw ultrasonic assisted circulation method of graphite flakes prepared by anode graphite from spent lithium-ion batteries for application in nanofluids
Source: Royal Society of Chemistry journal article supplement (doi:10.1039/d1se00973g), 2021-01-01
Supplement: d1se00973g1.pdf [file d1se00973g1.pdf]

*Supplementary Material*

**A facile freeze-thaw ultrasonic assisted circulation method of graphite flakes prepared by anode graphite from spent lithium-ion batteries for application in nanofluids**

Yu Qiao, Wen Sheng, Chen He, Bai Yang, Haoxuan Xu, Chenzhen Liu, Zhonghao Rao\*

Corresponding author. Tel.: +86 15094355485

E-mail address: raozhonghao@cumt.edu.cn

School of Electrical and Power Engineering, China University of Mining and Technology, Xuzhou, 221116, China.

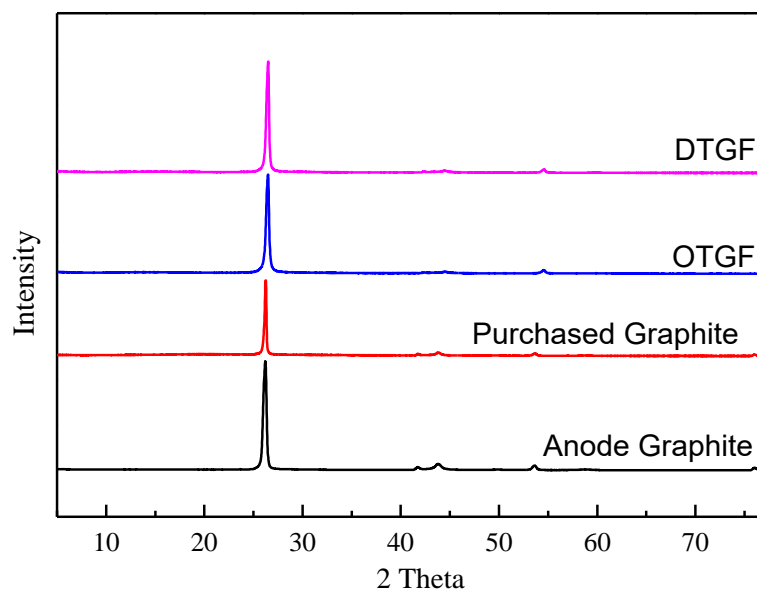

**Figure S1.** XRD images of graphite materials

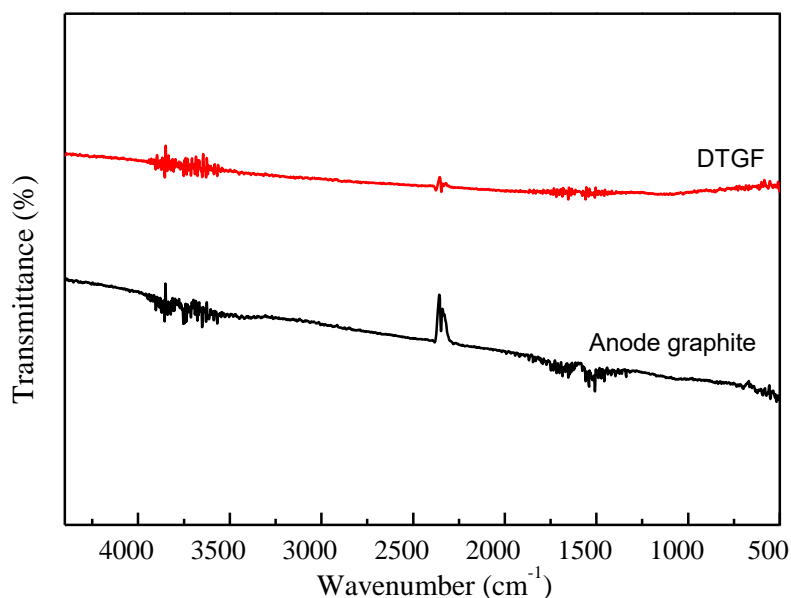

**Figure S2.** FT-IR images of anode graphite materials from spent lithium-ion batteries and DTGF.

*Supplementary Material*

---

**Table S1.** BET report of OTGF and DTGF

| Name                           | OTGF                                      | DTGF                                      |
|--------------------------------|-------------------------------------------|-------------------------------------------|
| BET Surface Area               | 13.9191 ± 1.1029 m <sup>2</sup> /g        | 16.6113 ± 2.1742 m <sup>2</sup> /g        |
| Slope                          | 0.262279 ± 0.024454 g/cm <sup>3</sup> STP | 0.140497 ± 0.033629 g/cm <sup>3</sup> STP |
| Y-Intercept                    | 0.050428 ± 0.003996 g/cm <sup>3</sup> STP | 0.121529 ± 0.006731 g/cm <sup>3</sup> STP |
| Q <sub>m</sub>                 | 3.1979 cm <sup>3</sup> /g STP             | 3.8164 cm <sup>3</sup> /g STP             |
| Correlation Coefficient        | 0.9789509                                 | 0.9472027                                 |
| Molecular Cross-Sectional Area | 0.1620 nm <sup>2</sup>                    | 0.1620 nm <sup>2</sup>                    |
